# Supplementary material for: Energetic mono and dibasic 5-dinitromethyltetrazolates: synthesis, properties, and particle processing
Source: Royal Society of Chemistry journal article supplement (doi:10.1039/b708041g), 2007-01-01
Supplement: b708041g.pdf [file b708041g.pdf]

## **Supplementary Information**

**for**

### **Energetic mono-, di-basic 5-dinitromethyltetrazolate: synthesis, properties, and particle processing**

Zhuo Zeng, Haixiang Gao, Brendan Twamley and Jean'ne M. Shreeve\*

Department of Chemistry, University of Idaho, Moscow, ID 83844-2343, USA

#### **Table of Contents**

**Part A:** Crystallographic Data and Structure Refinement

Parameters of compound **7** and co-crystallized compound **10**

**Part B:** *Ab Initio* computational data

**Part C :** Properties of energetic 5-dinitromethyltetrazolates

**Part A: Crystallographic Data and Structure Refinement Parameters of  
compound 7 and co-crystallized compound 10**

**Table S1. Crystallographic Data and Structure Refinement Parameters.**

|                                     | <b>Co-crystallized<br/>compound 10</b>                        | <b>Compound 7</b>                                              |
|-------------------------------------|---------------------------------------------------------------|----------------------------------------------------------------|
| formula                             | C <sub>8</sub> H <sub>16</sub> N <sub>18</sub> O <sub>5</sub> | C <sub>10</sub> H <sub>14</sub> N <sub>10</sub> O <sub>4</sub> |
| mol wt                              | 444.39                                                        | 338.31                                                         |
| Crystal system                      | Monoclinic, Cc                                                | Monoclinic, C2/c                                               |
| <i>a</i> (Å)                        | 11.9753(8)                                                    | 15.7214(10)                                                    |
| <i>b</i> (Å)                        | 23.2559(16)                                                   | 12.7935(8)                                                     |
| <i>c</i> (Å)                        | 6.8413(5)                                                     | 8.1458(5)                                                      |
| □ <i>α</i> (°)                      | 90                                                            | 72.11(3)                                                       |
| <i>β</i> (°)                        | 110.384(1)                                                    | 121.096(1)                                                     |
| □ <i>γ</i> (°)                      | 90                                                            | 70.28(2)                                                       |
| <i>V</i> (Å <sup>3</sup> )          | 1786.0(2)                                                     | 1402.95(15)                                                    |
| <i>Z</i>                            | 4                                                             | 4                                                              |
| <i>T</i> (K)                        | 90(2)                                                         | 90(2)                                                          |
| (Å)                                 | 0.71073                                                       | 0.71073                                                        |
| □ <i>calcd</i> (Mg/m <sup>3</sup> ) | 1.653                                                         | 1.602                                                          |
| □ (mm <sup>-1</sup> )               | 0.138                                                         | 0.128                                                          |
| <i>F</i> (000)                      | 920                                                           | 704                                                            |

|                                                 |                           |                        |
|-------------------------------------------------|---------------------------|------------------------|
| crystal size<br>(mm <sup>3</sup> )              | 0.44 x 0.13 x 0.03        | 0.36 x 0.07 x 0.06     |
| □ range (°)                                     | 1.75 to 29.00             | 2.20 to 25.25          |
|                                                 | -16 ≤ h ≤ 16,             | -18 ≤ h ≤ 18,          |
| Index ranges                                    | -31 ≤ k ≤ 31,             | -15 ≤ k ≤ 15,          |
|                                                 | -9 ≤ l ≤ 9                | -9 ≤ l ≤ 9             |
| no. refl. collected                             | 12564                     | 10924                  |
| no. indep.<br>reflections                       | 2372 [R(int) =<br>0.0305] | 1276 [R(int) = 0.0352] |
| data/restraints/pa<br>ram.                      | 2372 / 2 / 280            | 1276 / 0 / 111         |
| GOF                                             | 1.035                     | 1.019                  |
| *R <sub>1</sub> [I > 2σ(I)]                     | 0.0336                    | 0.0337                 |
| *wR <sub>2</sub> [I > 2σ(I)]                    | 0.0752                    | 0.0819                 |
| Largest diff.<br>peak, hole (eÅ <sup>-3</sup> ) | 0.288, -0.196             | 0.223, -0.198          |

$$\bullet R_1 = \frac{\sum ||F_o| - |F_c||}{\sum |F_o|}; wR_2 = \left\{ \frac{\sum [w(F_o^2 - F_c^2)^2]}{\sum [w(F_o^2)^2]} \right\}^{1/2}$$

**Table S2. Hydrogen bonds for Co-crystallized compound 10 [Å and °]**

| D-H...A                | d(D-H) | d(H...A) | d(D...A) | <(DHA) |
|------------------------|--------|----------|----------|--------|
| N(1)-H(1A)...O(5)      | 0.90   | 2.19     | 3.036(3) | 156.1  |
| N(1)-H(1B)...N(5)#1    | 0.89   | 2.33     | 3.142(3) | 151.4  |
| N(4)-H(4)...N(18)#2    | 0.88   | 1.83     | 2.653(3) | 153.8  |
| N(4)-H(4)...O(4)#3     | 0.88   | 2.51     | 2.964(2) | 113.1  |
| N(14)-H(14)...N(25)#2  | 0.88   | 1.92     | 2.741(3) | 154.7  |
| N(15)-H(15A)...O(5)#4  | 0.89   | 2.09     | 2.951(3) | 163.7  |
| N(15)-H(15B)...N(24)#4 | 0.89   | 2.21     | 3.042(3) | 154.2  |
| N(21)-H(21A)...N(15)#1 | 0.89   | 2.51     | 3.127(3) | 126.2  |
| N(21)-H(21A)...O(1)#4  | 0.89   | 2.52     | 3.274(3) | 141.9  |
| N(21)-H(21B)...O(2)#3  | 0.90   | 2.28     | 3.160(3) | 166.3  |
| N(21)-H(21B)...O(1)#3  | 0.90   | 2.54     | 3.258(3) | 137.9  |
| O(5)-H(5A)...N(11)#2   | 0.85   | 2.11     | 2.940(3) | 165.5  |
| O(5)-H(5A)...O(1)#2    | 0.85   | 2.41     | 2.943(2) | 121.4  |
| O(5)-H(5B)...N(19)#5   | 0.85   | 2.01     | 2.851(3) | 171.7  |
| C(3)-H(3)...O(2)#3     | 0.95   | 2.38     | 3.331(3) | 176.5  |
| C(3)-H(3)...O(4)#3     | 0.95   | 2.34     | 2.886(3) | 116.4  |

Symmetry transformations used to generate equivalent atoms:

#1  $x-1/2, -y+1/2, z-1/2$     #2  $x+1/2, -y+1/2, z+1/2$

#3  $x+1/2, y-1/2, z$     #4  $x+1/2, -y+1/2, z-1/2$     #5  $x, y, z+1$

**Table S3. Hydrogen bonds for Co-crystallized compound 7 [Å and °]**

| D-H...A              | d(D-H) | d(H...A) | d(D...A)   | <(DHA) |
|----------------------|--------|----------|------------|--------|
| N(4)-H(4)...N(8)#2   | 0.88   | 1.97     | 2.7566(18) | 148.3  |
| N(4)-H(4)...O(13)#3  | 0.88   | 2.47     | 2.9730(17) | 116.6  |
| C(1)-H(1A)...O(12)#4 | 0.98   | 2.50     | 3.309(2)   | 139.4  |
| C(3)-H(3)...O(13)#3  | 0.95   | 2.48     | 2.9869(19) | 113.1  |
| C(3)-H(3)...O(12)#4  | 0.95   | 2.37     | 3.1615(19) | 140.5  |
| C(6)-H(6)...O(12)#5  | 0.95   | 2.47     | 3.2706(19) | 142.0  |

Symmetry transformations used to generate equivalent atoms:

#1  $-x+1, y, -z+3/2$     #2  $-x+1/2, -y+1/2, -z+1$     #3  $-x+1/2, y+1/2, -z+3/2$

#4  $-x+1/2, -y+1/2, -z+2$     #5  $x, -y, z+1/2$

## Part B: *Ab Initio* computational data

**TABLE S4. Calculated( B3LYP/6-31+G\*\*//MP2/6-311++G\*\*) Total Energy ( $E_0$ ), Zero-Point Energy (ZPE), Values of Thermal Correction ( $H_T$ ), and Heats of Formation (HOF) of the Compounds or Ions.<sup>a</sup>**

| Name                             | $E_0$        | ZPE       | $H_T$     | HOF                 |
|----------------------------------|--------------|-----------|-----------|---------------------|
| 5-dinitromethyltetrazole anion   | -704.7683531 | 0.067177  | 0.010238  | 70.0                |
| 5-dinitromethyltetrazole dianion | -704.1153037 | 0.0513873 | 0.0127237 | 228.7105114         |
| amino guanidine                  | -260.5457263 | 0.114876  | 0.006214  | 667.4               |
| guanidine cation                 | -205.331961  | 0.094333  | 0.006227  | 566.7               |
| Tetrazole anion                  | -257.21883   | 0.03382   | 0.00422   | 170.0               |
| tetrazole                        | -257.7488254 | 0.046853  | 0.00443   | 334.5               |
| urea                             | -224.8323997 | 0.063642  | 0.005402  | -245.8 <sup>9</sup> |
| 1-methylimidazolium              | -265.3210147 | 0.112924  | 0.006392  | 680.6               |
| 4 amino triazole cation          | -297.3150795 | 0.089607  | 0.005933  | 936.3               |
| 3 amino 4 H triazole cation      | -297.3661712 | 0.089236  | 0.006303  | 804.5               |
| triazole cation                  | -242.10415   | 0.07324   | 0.00457   | 835.0 <sup>8</sup>  |
| imidazole cation                 | -226.10404   | 0.08524   | 0.00473   | 711.5               |
| CH <sub>4</sub>                  | -40.39849    | 0.044791  | 0.003812  | -74.6 <sup>9</sup>  |
| CH <sub>3</sub> NO <sub>2</sub>  | -244.5543604 | 0.049857  | 0.005272  | -74.3 <sup>9</sup>  |
| CH <sub>3</sub> NH <sub>2</sub>  | -95.6318759  | 0.064032  | 0.004369  | -23.0 <sup>9</sup>  |

|                                              |            |          |          |                    |
|----------------------------------------------|------------|----------|----------|--------------------|
| NH <sub>2</sub> NH <sub>2</sub>              | -111.63188 | 0.053399 | 0.004202 | 95.4 <sup>9</sup>  |
| NH <sub>2</sub> NH <sub>3</sub> <sup>+</sup> | -111.97353 | 0.06803  | 0.004309 | 770.0 <sup>8</sup> |
| NH <sub>3</sub>                              | -56.43462  | 0.034377 | 0.003818 | -45.9 <sup>9</sup> |

**Table S5. G2 Enthalpy of compounds or ions**

|                              | G2 Enthalpy(Hartree) | HOF(kJ/mol)         |
|------------------------------|----------------------|---------------------|
| NH <sub>3</sub>              | -56.454832           | -45.9 <sup>9</sup>  |
| NH <sub>4</sub> <sup>+</sup> | -56.777598           | 626.4               |
| Guanidine                    | -205.035186          | 26.0                |
| Guanidine cation             | -205.408542          | 566.7               |
| Carbohydride cation          | -335.720388          | 663.4               |
| Carbohydride                 | -335.387052          | 8.5                 |
| urea                         | -224.933512          | -245.8 <sup>9</sup> |
| Imidazole                    | -225.826518          | 132.9 <sup>9</sup>  |
| Imidazole anion              | -225.272371          | 57.7                |
| Tetrazine                    | -295.869844          | 482.3               |

**Geometry Coordinates**

**B3LYP/6-31+G(d,p) optimized geometries (Å)**

**5-dinitromethyltetrazole anion**

|   |             |             |             |
|---|-------------|-------------|-------------|
| C | -0.87079200 | -0.10193200 | 0.00408600  |
| N | -1.72930100 | 0.94338400  | -0.07646800 |
| N | -2.99925200 | 0.49547300  | 0.02634300  |
| N | -2.90697400 | -0.79224400 | 0.15357800  |
| N | -1.61851000 | -1.20692000 | 0.14766000  |
| C | 0.56623900  | 0.01167900  | -0.01012000 |
| N | 1.36387800  | -1.17994100 | -0.00273700 |
| O | 0.95046500  | -2.14330400 | -0.66895800 |
| O | 2.40019200  | -1.21508200 | 0.67520600  |
| N | 1.20434800  | 1.24215000  | -0.04321300 |
| O | 0.46933300  | 2.28651200  | -0.00411300 |
| O | 2.44003100  | 1.33579300  | -0.16215400 |
| H | -1.45218600 | 1.91684100  | -0.11977800 |

**5-dinitromethyltetrazole dianion**

|   |             |             |             |
|---|-------------|-------------|-------------|
| C | -0.90742600 | -0.00005400 | -0.00000200 |
| N | -1.66304400 | 0.09521800  | -1.11040200 |
| C | 0.56780000  | -0.00000400 | -0.00001200 |
| N | 1.25141900  | -1.21847000 | -0.00675400 |
| O | 0.54851500  | -2.26475300 | -0.11492800 |

|   |             |             |             |
|---|-------------|-------------|-------------|
| O | 2.50252800  | -1.30284100 | 0.10885400  |
| N | 1.25133200  | 1.21851200  | 0.00677200  |
| O | 0.54839700  | 2.26473900  | 0.11483800  |
| O | 2.50247600  | 1.30293100  | -0.10881600 |
| N | -2.92962800 | 0.05697800  | -0.66273000 |
| N | -2.92960200 | -0.05699700 | 0.66277200  |
| N | -1.66298600 | -0.09527800 | 1.11041500  |

**aminoguanidine cation**

|   |             |             |             |
|---|-------------|-------------|-------------|
| C | 0.50180300  | 0.01037900  | 0.00031200  |
| N | 0.42059000  | 1.32116100  | -0.00019900 |
| H | -0.49566000 | 1.72899400  | -0.00058500 |
| H | 1.22445500  | 1.91270000  | 0.00058800  |
| N | 1.67295700  | -0.61249600 | 0.00002700  |
| H | 1.74196200  | -1.60921600 | 0.00010300  |
| H | 2.53406500  | -0.10583300 | -0.00076200 |
| N | -0.62208200 | -0.70669400 | 0.00020100  |
| H | -0.60800800 | -1.70643200 | -0.00146800 |
| N | -1.85166700 | 0.00553400  | -0.00003300 |
| H | -2.37328000 | -0.16777800 | -0.84191600 |
| H | -2.37293500 | -0.16724900 | 0.84219400  |

**Tetrazole**

Supplementary Material (ESI) for Journal of Materials Chemistry  
This journal is (c) The Royal Society of Chemistry 2007

|   |             |             |             |
|---|-------------|-------------|-------------|
| C | -0.96258400 | -0.52379200 | 0.00001800  |
| N | -0.69368800 | 0.79729100  | 0.00002200  |
| H | -1.30811800 | 1.59924600  | 0.00003000  |
| H | -1.95172700 | -0.95502400 | 0.00001800  |
| N | 0.64923400  | 0.96367000  | -0.00006800 |
| N | 0.17991700  | -1.17893300 | -0.00006000 |
| N | 1.15530100  | -0.22509500 | 0.00008300  |

**Urea**

|   |                |                |               |
|---|----------------|----------------|---------------|
| C | 0.0708549875,  | 0.1346947463,  | 0.0909678525  |
| N | 0.4639946892,  | 0.026372018,   | 1.4157932148  |
| H | 0.095704513,   | -0.7902697546, | 1.8824224155  |
| H | 0.5072127185,  | 0.8620689899,  | 1.9819400834  |
| N | 0.3437976012,  | 1.3639658806,  | -0.4893499693 |
| H | 0.231291075,   | 1.3712789641,  | -1.4932136095 |
| H | 1.1231165879,  | 1.9046519482,  | -0.1412461807 |
| O | -0.4726193123, | -0.7791715185, | -0.5163516094 |

**3-amino triazole cation**

|   |             |             |             |
|---|-------------|-------------|-------------|
| C | 1.46181300  | 0.57038700  | -0.00002200 |
| C | -0.67509100 | 0.00946600  | 0.00000300  |
| N | 1.46260300  | -0.72410300 | 0.00000500  |
| H | 2.34327500  | 1.19450000  | -0.00002900 |
| H | -0.10020500 | 2.04934300  | -0.00031200 |

Supplementary Material (ESI) for Journal of Materials Chemistry  
This journal is (c) The Royal Society of Chemistry 2007

|   |             |             |             |
|---|-------------|-------------|-------------|
| H | -0.13059000 | -2.04371900 | -0.00025400 |
| N | 0.12871800  | -1.06493700 | 0.00027400  |
| N | 0.16663600  | 1.07218400  | -0.00014000 |
| N | -2.00956000 | 0.03574400  | -0.00017700 |
| H | -2.55012700 | -0.81797300 | -0.00145800 |
| H | -2.52146500 | 0.90651800  | 0.00243300  |

**Triazole cation**

|   |             |             |             |
|---|-------------|-------------|-------------|
| C | 1.06781200  | -0.42029800 | 0.00010900  |
| C | -0.67893500 | 0.90127700  | 0.00004600  |
| N | -1.03482600 | -0.37525900 | 0.00001900  |
| H | -1.97587900 | -0.75959900 | 0.00001500  |
| H | 2.09994900  | -0.74013000 | 0.00012600  |
| H | -1.33110800 | 1.76370500  | 0.00006000  |
| N | 0.66202000  | 0.89692400  | -0.00007200 |
| H | 1.25870500  | 1.71927200  | -0.00014000 |
| N | 0.03210100  | -1.21725400 | -0.00009000 |

**4-amino triazole cation**

|   |             |             |             |
|---|-------------|-------------|-------------|
| C | 0.17327200  | -1.07585200 | -0.00040800 |
| C | 0.15861600  | 1.11430100  | -0.00044600 |
| N | -0.64703300 | -0.01203200 | -0.00018100 |
| H | -0.13714300 | -2.11145700 | -0.00032200 |
| H | -0.21854600 | 2.12736000  | 0.00020900  |

|   |             |             |             |
|---|-------------|-------------|-------------|
| N | -2.04081200 | -0.14197000 | 0.00039100  |
| H | -2.43008400 | 0.28136800  | 0.83991600  |
| H | -2.43052000 | 0.27985400  | -0.83970400 |
| N | 1.42022700  | 0.77809000  | 0.00008200  |
| N | 1.40254600  | -0.58318300 | 0.00030500  |
| H | 2.28046500  | -1.09415300 | 0.00085700  |

## G2 optimized geometries (Å)

### Imidazole

|   |             |             |             |
|---|-------------|-------------|-------------|
| C | -0.55574700 | 1.01796500  | -0.00000100 |
| C | -1.14844100 | -0.22420500 | 0.00000000  |
| C | 0.96069000  | -0.58933000 | -0.00000200 |
| N | 0.79502700  | 0.76509900  | -0.00000600 |
| H | 1.53112700  | 1.45970000  | 0.00003500  |
| H | -0.95464100 | 2.02136600  | 0.00000800  |
| H | -2.20503500 | -0.45450900 | -0.00002100 |
| H | 1.93667600  | -1.05576300 | -0.00002100 |
| N | -0.20176100 | -1.22186700 | 0.00000800  |

### Guanidine

|   |            |             |             |
|---|------------|-------------|-------------|
| C | 0.01762200 | 0.12356900  | -0.00018000 |
| N | 1.00281500 | -0.86773300 | 0.08409900  |
| H | 0.81418400 | -1.66607800 | -0.51364400 |

Supplementary Material (ESI) for Journal of Materials Chemistry  
This journal is (c) The Royal Society of Chemistry 2007

|   |             |             |             |
|---|-------------|-------------|-------------|
| H | 1.94418400  | -0.51809800 | -0.05399300 |
| N | -1.25960800 | -0.43321500 | -0.08986100 |
| H | -1.41141100 | -1.18838500 | 0.57135700  |
| H | -1.96285800 | 0.29226900  | 0.00709100  |
| N | 0.16474800  | 1.39937900  | 0.01074900  |
| H | 1.15448600  | 1.64986300  | -0.04464600 |

**Guanidine cation**

|   |             |             |             |
|---|-------------|-------------|-------------|
| C | 0.00000000  | 0.00000100  | 0.00000000  |
| N | -0.32933100 | -1.29225100 | 0.00000000  |
| H | 0.34959600  | -2.00922500 | -0.22246400 |
| N | 1.28378800  | 0.36091600  | 0.00000000  |
| H | 2.01719100  | -0.30023000 | 0.22246300  |
| N | -0.95445700 | 0.93133400  | -0.00000100 |
| H | -1.91483800 | 0.70185000  | -0.22246000 |
| H | -0.74859400 | 1.89705400  | 0.22246400  |
| H | -1.26860100 | -1.59682500 | 0.22246500  |
| H | 1.56524200  | 1.30737200  | -0.22246200 |

**NH<sub>2</sub>NHCONHNH<sub>2</sub> (carbohydrazide)**

|   |             |            |             |
|---|-------------|------------|-------------|
| C | 0.04385200  | 0.55239500 | -0.00446600 |
| O | 0.51725600  | 1.67626400 | 0.08169500  |
| N | -1.33544400 | 0.37820200 | -0.21359500 |
| H | -1.84487000 | 1.20153000 | 0.09968900  |

Supplementary Material (ESI) for Journal of Materials Chemistry  
This journal is (c) The Royal Society of Chemistry 2007

|   |             |             |             |
|---|-------------|-------------|-------------|
| N | 0.72425900  | -0.63719100 | 0.06031600  |
| H | 0.19711000  | -1.47089200 | -0.17882300 |
| N | -1.90160500 | -0.88752000 | 0.06584200  |
| H | -2.27707700 | -0.91841900 | 1.01435100  |
| H | -2.66762200 | -1.03892600 | -0.58554800 |
| N | 2.12277800  | -0.61308500 | -0.01825100 |
| H | 2.49598800  | -1.23364200 | 0.69463100  |
| H | 2.42539600  | -0.94697900 | -0.93124300 |

**NH<sub>2</sub>NHCONHNH<sub>2</sub> cation**

|   |             |             |             |
|---|-------------|-------------|-------------|
| C | -0.84420000 | 0.01729900  | -0.00384100 |
| O | -2.05335200 | -0.05809200 | 0.02748500  |
| N | -0.07051800 | -1.12207300 | -0.39284000 |
| H | -0.63852900 | -1.96717700 | -0.31693800 |
| N | -0.11981100 | 1.15164800  | 0.30552200  |
| H | -0.71064300 | 1.98073500  | 0.37088700  |
| N | 1.18776300  | 1.31143400  | -0.22808000 |
| H | 1.15357100  | 1.70171200  | -1.17417800 |
| H | 1.68844000  | 1.97001900  | 0.37005400  |
| H | 1.16390600  | -1.49425300 | 1.24733000  |
| H | 1.74276400  | -1.99977300 | -0.25087300 |
| H | 1.65650800  | -0.31186500 | 0.07976900  |
| N | 1.20770800  | -1.27221800 | 0.24070100  |

### Part C : Properties of energetic 5-dinitromethyltetrazolates

| <i>Salt</i> | $D^a$ | $T_m^b$ | $T_d^c$ | $OB^d$ | $\Delta H_f^e$<br>cation | $\Delta H_f^e$<br>anion | <i>Lattice energy</i> <sup>f</sup> | $\Delta H_f^g$ | $P^h$ | $vD^i$ | $I_{sp}^j$ |
|-------------|-------|---------|---------|--------|--------------------------|-------------------------|------------------------------------|----------------|-------|--------|------------|
| <b>2</b>    | 1.66  | -       | 161.1   | -45    | 667.4                    | 70.0                    | 482.0                              | 255.4          | 26.3  | 8253   | 230.7      |
| <b>3</b>    | 1.61  | -       | 152.6   | -54    | 667.4                    | 228.7                   | 1260.5                             | 303.1          | 24.4  | 8312   | 212.9      |
| <b>4</b>    | 1.87  | -       | 178.9   | -36    | 663.4                    | 70.0                    | 489.2                              | 244.2          | 37.7  | 9188   | 246.3      |
| <b>5</b>    | 1.62  | -       | 165.8   | -40    | 663.4                    | 228.7                   | 1218.9                             | 336.7          | 26.2  | 8319   | 237.7      |
| <b>6</b>    | 1.67  | -       | 104.5   | -75    | 680.5                    | 70.0                    | 478.9                              | 271.7          | 21.2  | 7436   | 209.0      |
| <b>7</b>    | 1.60  | -       | 115.7   | -108   | 680.5                    | 228.7                   | 1234.6                             | 355.3          | 19.7  | 6959   | 191.9      |
| <b>8</b>    | 1.84  | -       | 127.8   | -43    | 835.0                    | 70.0                    | 497.7                              | 407.3          | 31.7  | 8580   | 233.3      |
| <b>9</b>    | 1.86  | -       | 84.5    | -44    | 806.3                    | 70.0                    | 491.4                              | 384.9          | 33.1  | 8787   | 226.9      |
| <b>10</b>   | 1.76  | 149.5   | 193.4   | -44    | 936.3                    | 70.0                    | 484.4                              | 521.9          | 29.4  | 8414   | 240.9      |
| <b>TNT</b>  | 1.65  | -       | 300.0   | -74    |                          |                         |                                    | -70.5          | 19.5  | 6881   |            |
| <b>NTO</b>  | 1.92  | -       |         | -25    |                          |                         |                                    | -237.8         | 31.1  | 8558   |            |
| <b>TNAZ</b> | 1.84  | -       | 240.0   | -17    |                          |                         |                                    | 45.3           | 36.4  | 9006   |            |
| <b>ADN</b>  | 1.81  | 92      | 127.0   | 25.8   | 626.4                    | -156.2                  | 592.9                              | -149.7         | 23.7  | 8074   |            |

<sup>a</sup> density (g/cm<sup>3</sup>); <sup>b</sup> melting point (°C); <sup>c</sup> decomposition temperature (°C); <sup>d</sup> oxygen

balance (OB) - index of the deficiency or excess of oxygen in a compound required to

convert all C into CO<sub>2</sub> and all H into H<sub>2</sub>O. For a compound with the molecular

formula of C<sub>a</sub>H<sub>b</sub>N<sub>c</sub>O<sub>d</sub>, OB (%) = 1600[(d - 2a - b/2)/M<sub>w</sub>]; <sup>e</sup> Heat of formation cation

and anion (kJ/mol); <sup>f</sup> Lattice energy of salt (kJ/mol); <sup>g</sup> Heat of formation of salt

(kJ/mol); <sup>h</sup> detonation pressure (GPa); <sup>i</sup> detonation velocity (m s<sup>-1</sup>); <sup>j</sup> I<sub>sp</sub> - specific

impulse (s).
